# Supplementary material for: Direct and Sensitive Electrochemical Evaluation of Pramipexole Using Graphitic Carbon Nitride (gCN) Sensor
Source: MDPI journal article supplement (doi:10.3390/bios12080552), 2022-07-22
Supplement: s1 [file s1]

# Direct and sensitive electrochemical evaluation of pramipexole using graphitic carbon nitride (gCN) sensor

Yogesh M. Shanbhag<sup>1</sup>, Mahesh M. Shanbhag<sup>2</sup>, Shweta J. Malode<sup>1</sup>, S. Dhanalakshmi<sup>1</sup>, Kunal Mondal<sup>3\*</sup>,  
Nagaraj P. Shetti<sup>1\*</sup>

## Supplementary Information

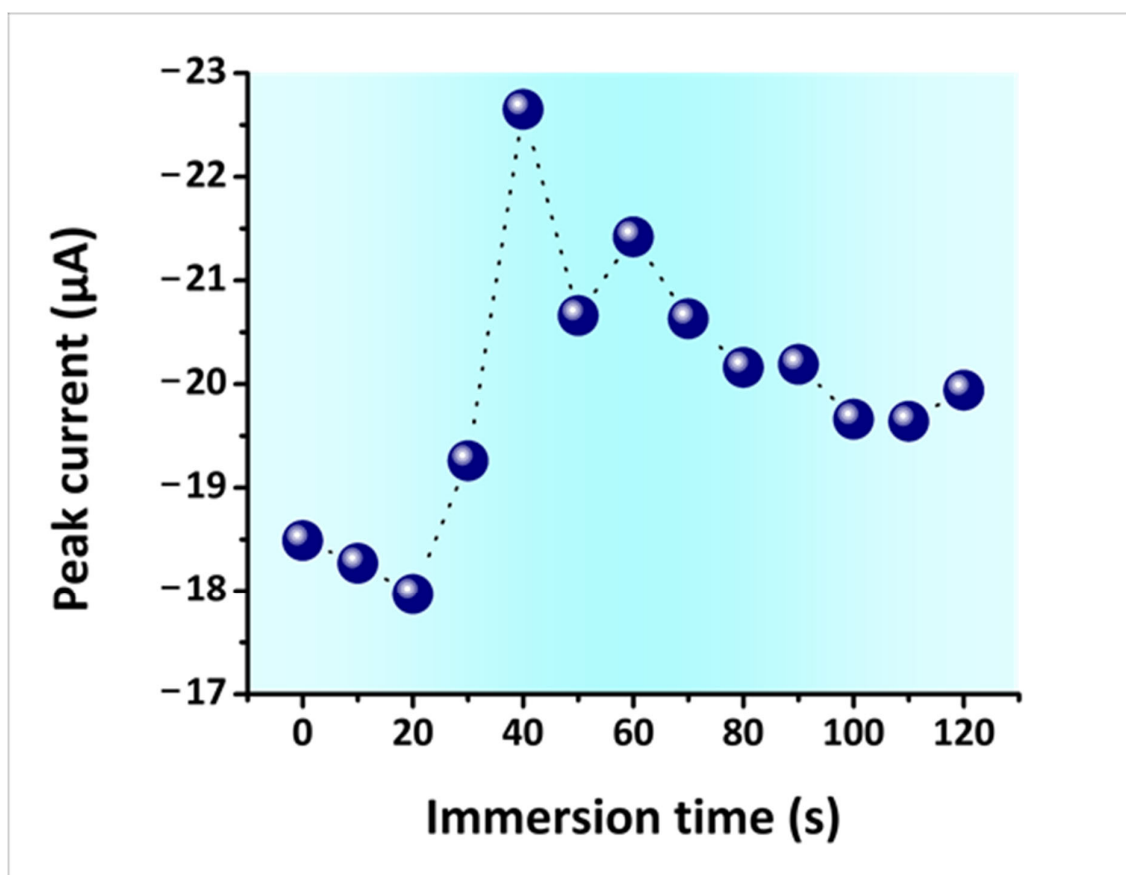

Figure S1. Effect of immersion time.

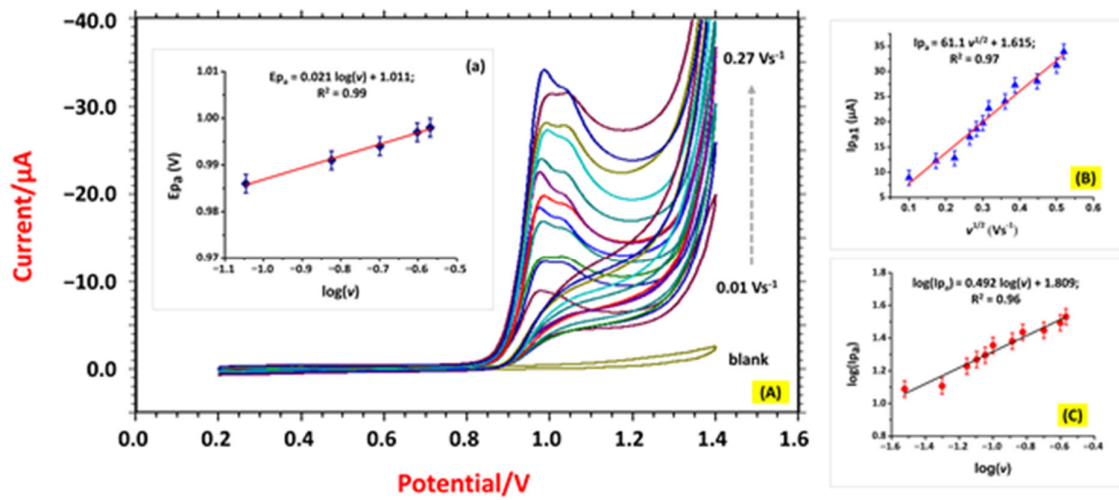

**Figure S2.** (A) Voltammetric behavior of 0.5 mM PMXL at different scan rates in pH 3.02 (inset: (a) influence of scan rate of peak potential); (B) dependency of peak current on square root of scan rate; (C) relationship between  $\log(v)$  and  $\log(I_p)$ .

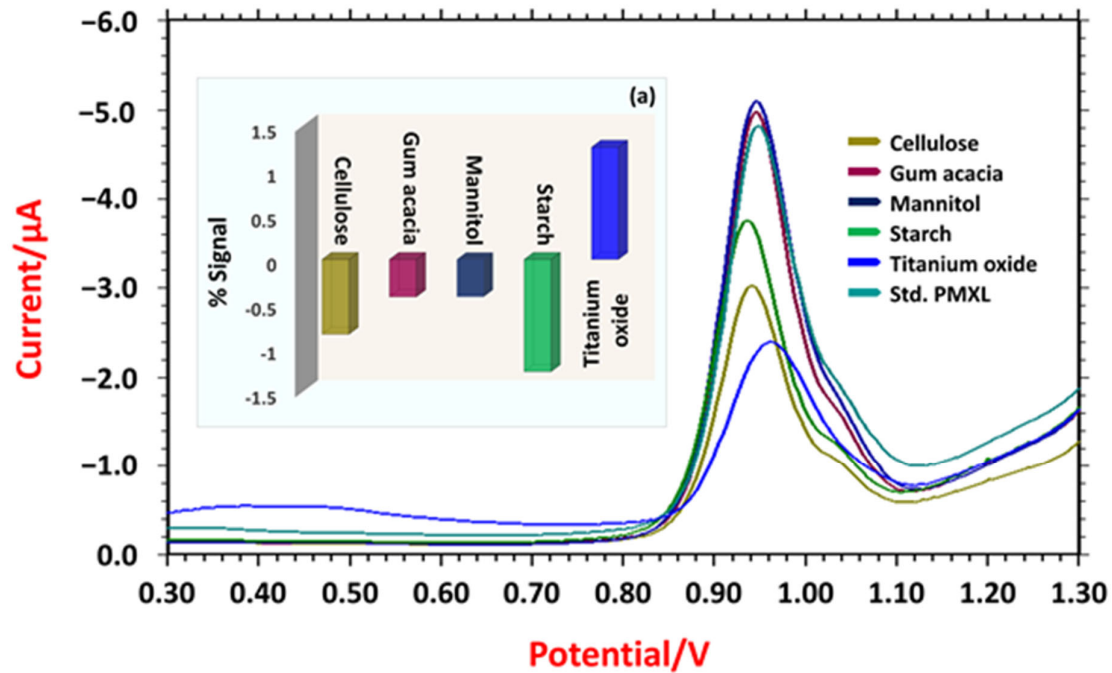

**Figure S3.** SWV responses of PMXL in presence of different excipients in pH 3.02 at  $t_{imm}$  of 40 s; (a) Bar diagram for change in % signal.

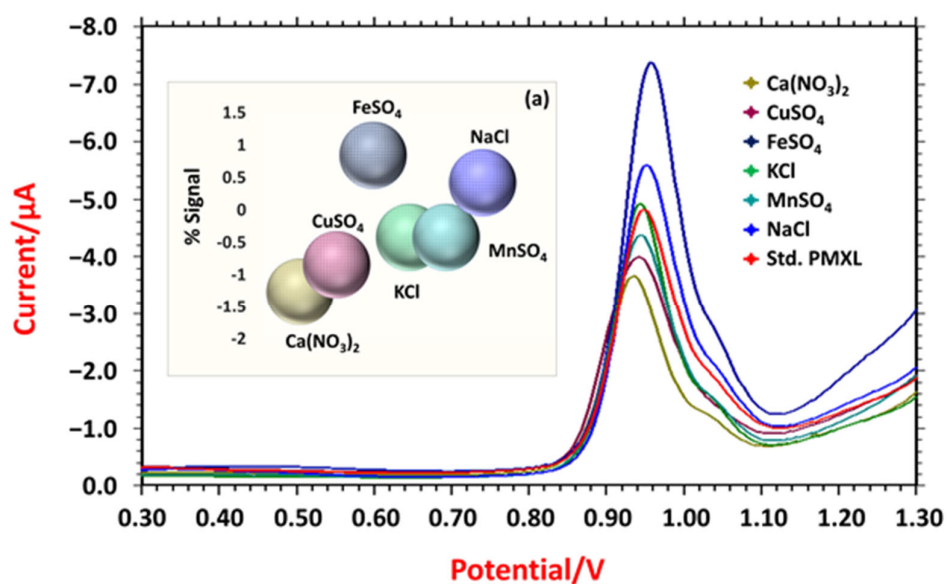

Figure S4. SWV of metal ion interference study inset: (a) graphical representation for % signal change.

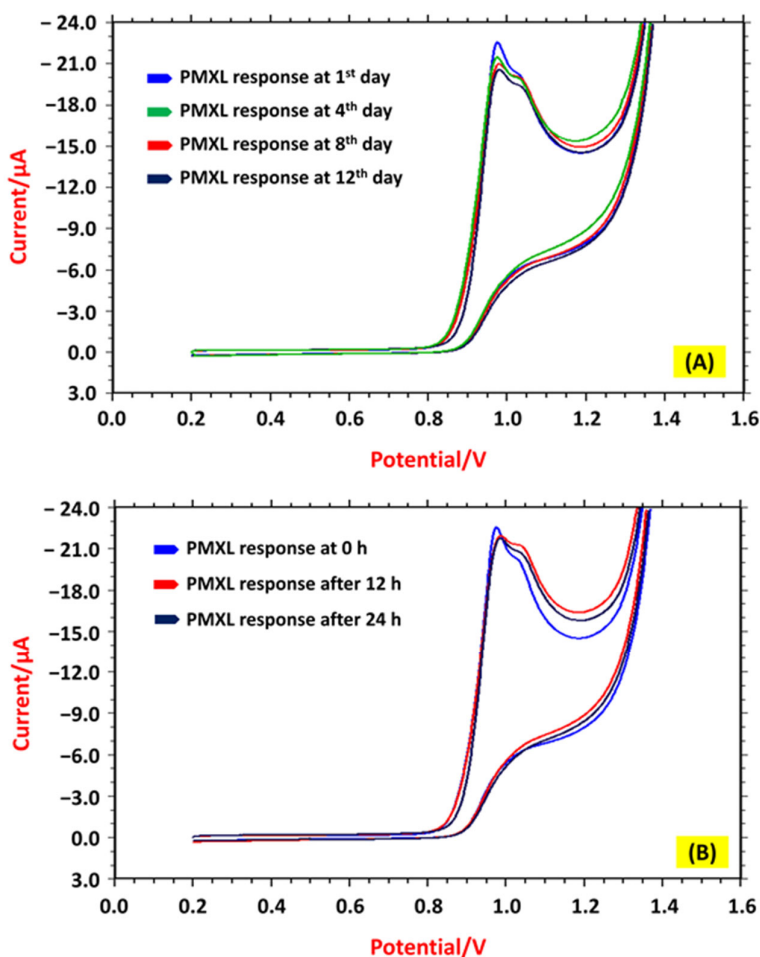

Figure S5. Electrode stability investigation. CV response of (A) Repeatability; (B) Reproducibility.

**Table S1.** Specifications of calibration curve of PMXL at gCN·CPE.

|                                                                           |              |
|---------------------------------------------------------------------------|--------------|
| Linearity ( $\mu\text{M}$ )                                               | 0.05 – 500.0 |
| Calibration curve slope ( $\mu\text{A M}^{-1}$ )                          | 0.379        |
| Intercept of calibration curve ( $\mu\text{A}$ )                          | 0.292        |
| SD of intercept                                                           | 0.00517      |
| Average slope value                                                       | 0.3798       |
| Regression coefficient ( $R^2$ )                                          | 0.99         |
| RSD of the slope (in %)                                                   | 0.385        |
| RSD of the intercept (in %)                                               | 0.520        |
| Total test point considered                                               | 11           |
| $L_D$ ( $\mu\text{M}$ )                                                   | 0.012        |
| $L_Q$ ( $\mu\text{M}$ )                                                   | 0.039        |
| Sensitivity ( $\mu\text{A} \cdot \mu\text{M}^{-1} \cdot \text{cm}^{-2}$ ) | 7.44         |
| % RSD for repeatability                                                   | 1.661        |
| % RSD for reproducibility                                                 | 0.790        |
